# Supplementary material for: Initial implementation of the resuscitation quality improvement program in emergency department of a teaching hospital in China
Source: PeerJ. 2022 Nov 15;10:e14345. doi: 10.7717/peerj.14345 (PMC9673765; doi:10.7717/peerj.14345)
Supplement: Supplemental Information 2 [file peerj-10-14345-s002.xlsx]

## Sheet: Sheet1
	性别
	年龄	18-29
		30-39
		40-49
		50-59
		60岁以上
	职业	医师
		护士
		其他（请详细注明）
	职称	初级
		中级
		副高级
		正高级
		主管护师
		护士
	工作年限	小于5年
		5-10年
		11-15年
		16-20年
		大于20年
	学历	中专
		大专
		本科
		硕士
		博士
		博士后
		其他
	所在科室	急诊
		护理部
		心内科
		重症医学科
		健康医学部
	所在区域	抢救室
		急诊综合二病房
		输液室
		分诊台
		留观室
		急诊综合一病房
		其他
	是否参与过美国心脏协会基础生命支持的培训
	是否为美国心脏协会BLS培训的导师
	是否为美国心脏协会BLS培训主任培训导师
	请问您最近一次BLS课程的时间为	3个月内
		3-不足6个月
		6-不足9个月
		9-不足1年
		12月以上
	如未参加过AHA BLS课程，请问您是否参加过其他心肺复苏课程	3个月内
	请问您最近一次参加培训的时间为	3-不足6个月
		6-不足9个月
		9-不足1年
		12月以上
	请问您到目前为止完成了哪些RQI学习项目？	入门课程
		3个月课程
		6个月课程
		9个月课程
		1年课程
	以下为对本次课程满意度的调查
	我对RQI项目中安排在模拟人技能训练前的网络学习非常满意	非常赞同
		赞同
		中立
		不赞同
		非常不赞同
	我对RQI项目中关于团队复苏的虚拟模拟案例训练部分非常满意	非常赞同
		赞同
		中立
		不赞同
		非常不赞同
	我对RQI项目技能练习为台车模拟人形式非常满意	非常赞同
		赞同
		中立
		不赞同
		非常不赞同
	我对RQI项目技能学习部分能够自我支配时间非常满意	非常赞同
		赞同
		中立
		不赞同
		非常不赞同
	我认为RQI项目技能学习部分中模拟人练习部分的时间分配非常合理	非常赞同
		赞同
		中立
		不赞同
		非常不赞同
	我认为RQI项目中模拟人部分的训练环境非常合理	非常赞同
		赞同
		中立
		不赞同
		非常不赞同
	我认为RQI项目中模拟人训练部分的网络环境非常合理	非常赞同
		赞同
		中立
		不赞同
		非常不赞同
	我认为RQI项目中模拟人部分的训练系统反馈对我的学习非常有帮助	非常赞同
		赞同
		中立
		不赞同
		非常不赞同
	我认为RQI项目的内容设置非常满意	非常赞同
		赞同
		中立
		不赞同
		非常不赞同
	我认为RQI项目中无导师参与更有利于我的学习效果	非常赞同
		赞同
		中立
		不赞同
		非常不赞同
	增加一些开放性问题：比如练习中是否遇到什么困难？或者还有什么改进建议？
	请问您此次培训中遇到了什么困难	时间安排
		场地局促
		场地不方便进入
		网络因素
		课程内容设置不合理
		自身健康因素
		其他原因（请详细说明）
	请问您对入门课程中最满意的部分为	网络教学学习
		上机练习部分
		其他
	请问您对此次项目的整体满意度为？	1-10分，1分为完全不满意，10分为非常满意
	为了更好的完成心肺复苏培训项目，我们诚挚的邀请您为本项目提出改进意见
