# Supplementary material for: Initial implementation of the resuscitation quality improvement program in emergency department of a teaching hospital in China
Source: PeerJ. 2022 Nov 15;10:e14345. doi: 10.7717/peerj.14345 (PMC9673765; doi:10.7717/peerj.14345)
Supplement: Supplemental Information 3 [file peerj-10-14345-s003.xlsx]

## Sheet: Sheet1
	Sex	male
		female
	Age (year)	18~29
		30~39
		40~49
		50~59
		>=60
	Occupation	doctor
		Nurse
	Job title	Primary
		Intermediate
		Deputy Senior
	Working years (year)	<5
		5~10
		11~15
		16~20
		>20
	Education	Junior college
		Undergraduate
		Master
		Doctor
		Post-doctor
	Working area	Emergency room
		Triage area
		EICU
		General Ward
		Observing room
		Other
	Have you attended BLS course?	Yes
		No
	If you had attened BLS course, then the time of last traditional BLS course is ?(month)	<3
		3~5
		6~9
		10~12
		>12
	Self-confidence rating on CPR post RQI entry course (from 1 to 10 score, "1" means "Strongly disconfidenced", "10" means "Strongly confidenced")
	You confidence in adult compression
	You confidence in infant compression
	You confidence in adult ventilation
	You confidence in infant ventilation
	Results of RQI Satisfaction Survey
	I prefer the e-learning of the RQI program to classroom teaching.	Strongly agreed
		Agreed
		Neutral
		Disagreed
		Strongly disagreed
	I like the module of virtual simulation for team resuscitation.	Strongly agreed
		Agreed
		Neutral
		Disagreed
		Strongly disagreed
	I like the form of cart simulator.	Strongly agreed
		Agreed
		Neutral
		Disagreed
		Strongly disagreed
	I like the form of control my free time in the psychomotor skill.	Strongly agreed
		Agreed
		Neutral
		Disagreed
		Strongly disagreed
	I think the allocation of time of the simulation part in the skill learning is reasonable.	Strongly agreed
		Agreed
		Neutral
		Disagreed
		Strongly disagreed
	I think the training environment of simulator is good.	Strongly agreed
		Agreed
		Neutral
		Disagreed
		Strongly disagreed
	I think the real-time feedback of the RQI program is very helpful.	Strongly agreed
		Agreed
		Neutral
		Disagreed
		Strongly disagreed
	I think the content settings of the RQI program are good.	Strongly agreed
		Agreed
		Neutral
		Disagreed
		Strongly disagreed
	I think no instructor-led training is more conducive to my learning	Strongly agreed
		Agreed
		Neutral
		Disagreed
		Strongly disagreed
